# Supplementary material for: Astragalus membranaceus Extract Prevents Calcium Oxalate Crystallization and Extends Lifespan in a Drosophila Urolithiasis Model
Source: MDPI journal article supplement (doi:10.3390/life12081250), 2022-08-16
Supplement: s1 [file s1]

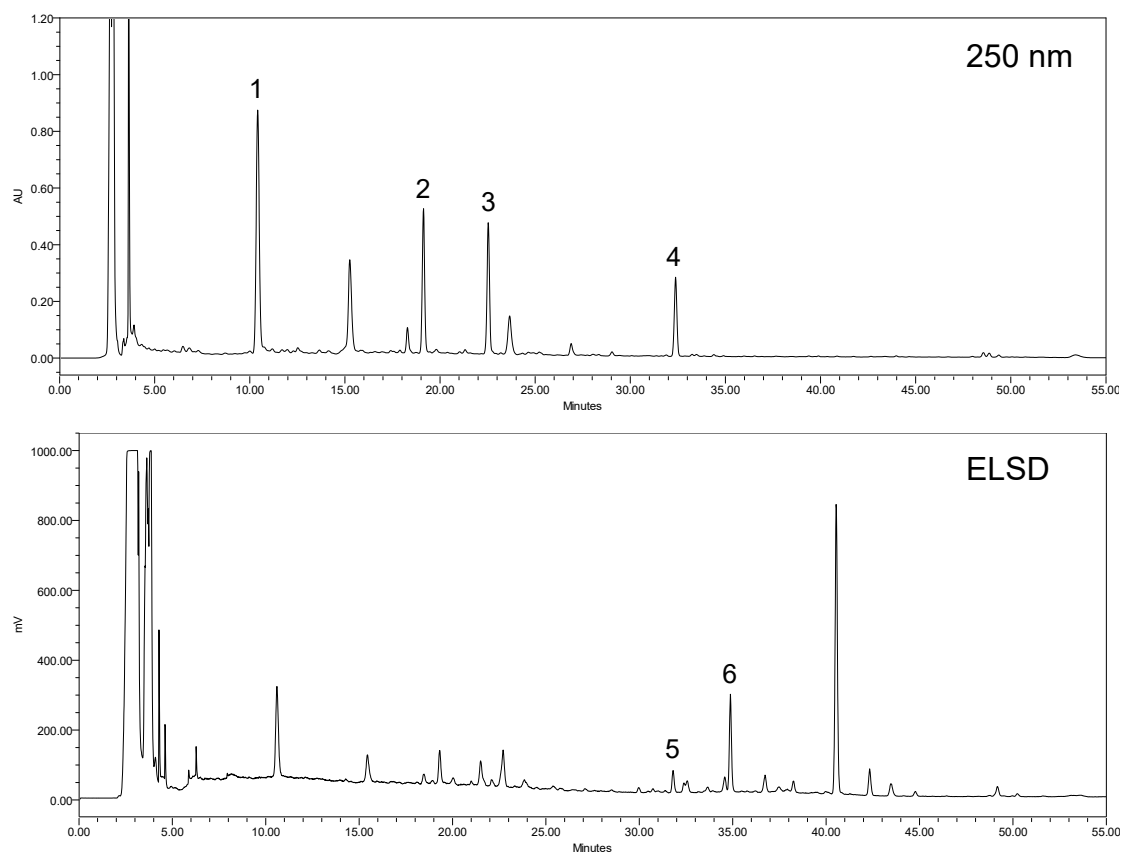

| # | Name                                   | Retention time (min) | Assay (mg/g) | Detection |
|---|----------------------------------------|----------------------|--------------|-----------|
| 1 | Calycosin<br>7-O- $\beta$ -D-glucoside | 10.42                | 0.345        | 250 nm    |
| 2 | Ononin                                 | 19.13                | 0.161        | 250 nm    |
| 3 | Calycosin                              | 22.54                | 0.108        | 250 nm    |
| 4 | Formononetin                           | 32.38                | 0.053        | 250 nm    |
| 5 | Astragaloside IV                       | 31.81                | 0.115        | ELSD      |
| 6 | Astragaloside II                       | 34.88                | 0.409        | ELSD      |

**Figure S1.** HPLC analysis for *Astragalus membranaceus* extract.

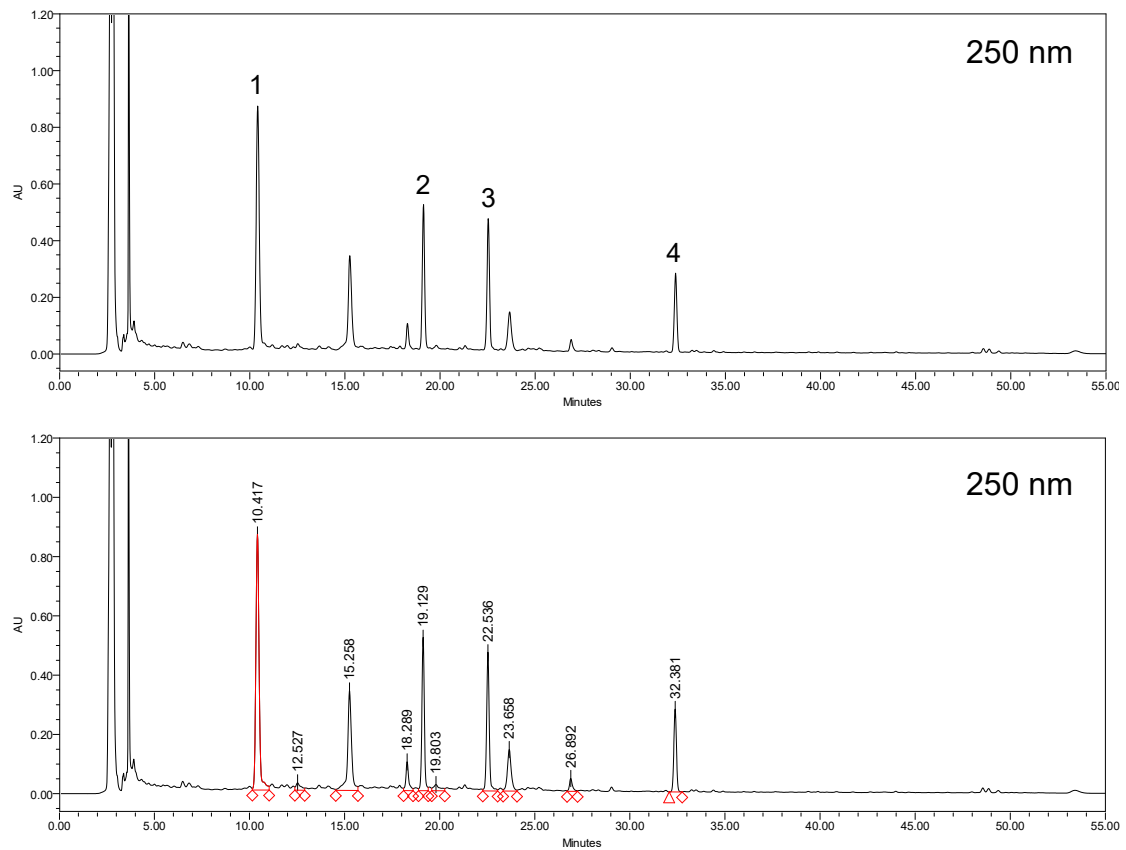

| # | Name                        | Retention Time (min) | Area     | % Area | Height | Int Type |
|---|-----------------------------|----------------------|----------|--------|--------|----------|
| 1 | Calycosin 7-O-β-D-glucoside | 10.417               | 10266885 | 32.67  | 862316 | VV       |
|   |                             | 12.527               | 440411   | 1.40   | 24731  | VV       |
|   |                             | 15.258               | 4848909  | 15.43  | 337635 | VV       |
|   |                             | 18.289               | 1010298  | 3.21   | 97592  | VV       |
| 2 | Ononin                      | 19.129               | 4661005  | 14.83  | 517530 | VV       |
|   |                             | 19.803               | 493484   | 1.57   | 20988  | VV       |
| 3 | Calycosin                   | 22.536               | 4536924  | 14.43  | 468068 | VV       |
|   |                             | 23.658               | 2009115  | 6.39   | 140493 | VV       |
|   |                             | 26.892               | 485318   | 1.54   | 43511  | VV       |
| 4 | Formononetin                | 32.381               | 2678304  | 8.52   | 279294 | BV       |

**Figure S2.** 2D-HPLC chromatogram of *Astragalus membranaceus* extract analyzed at 250 nm by photodiode array detector.

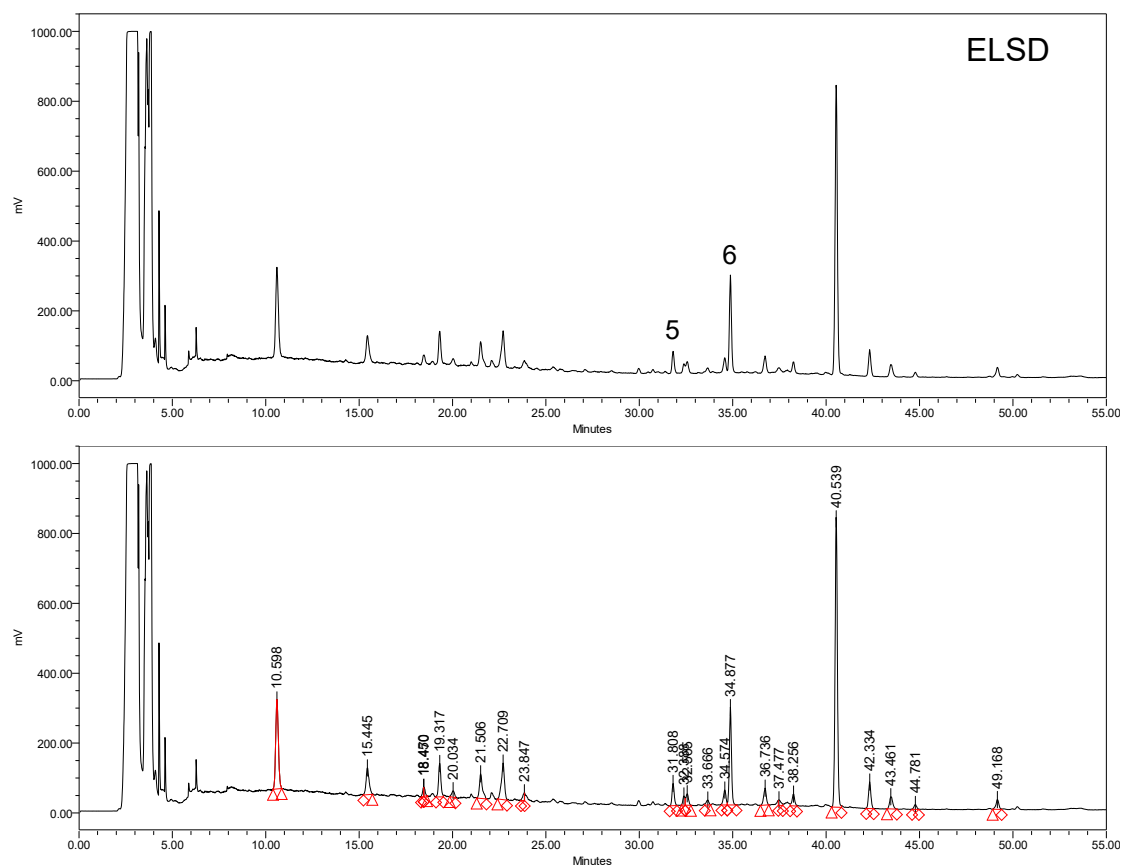

| #  | Name             | Retention Time (min) | Area    | % Area | Height | Int Type |
|----|------------------|----------------------|---------|--------|--------|----------|
| 1  |                  | 10.598               | 2572287 | 12.65  | 256731 | BB       |
| 2  |                  | 15.445               | 867152  | 4.27   | 76994  | VB       |
| 3  |                  | 18.450               | 111571  | 0.55   | 25967  | VV       |
| 4  |                  | 18.470               | 130802  | 0.64   | 26509  | VB       |
| 5  |                  | 19.317               | 845656  | 4.16   | 95663  | VV       |
| 6  |                  | 20.034               | 189006  | 0.93   | 18785  | BV       |
| 7  |                  | 21.506               | 778282  | 3.83   | 70502  | BV       |
| 8  |                  | 22.709               | 1186365 | 5.84   | 104301 | BV       |
| 9  |                  | 23.847               | 146593  | 0.72   | 22514  | VV       |
| 10 | Astragaloside IV | 31.808               | 525710  | 2.59   | 63689  | VV       |
| 11 |                  | 32.388               | 197805  | 0.97   | 26224  | BV       |
| 12 |                  | 32.565               | 323210  | 1.59   | 32574  | VB       |
| 13 |                  | 33.666               | 143634  | 0.71   | 14170  | VB       |
| 14 |                  | 34.574               | 405970  | 2.00   | 43217  | VV       |
| 15 | Astragaloside II | 34.877               | 2215897 | 10.90  | 278858 | VV       |
| 16 |                  | 36.736               | 472879  | 2.33   | 48432  | BB       |
| 17 |                  | 37.477               | 148316  | 0.73   | 15830  | VV       |
| 18 |                  | 38.256               | 331681  | 1.63   | 33997  | VV       |
| 19 |                  | 40.539               | 7198956 | 35.41  | 831368 | BV       |
| 20 |                  | 42.334               | 672861  | 3.31   | 76129  | VV       |
| 21 |                  | 43.461               | 412914  | 2.03   | 35093  | BV       |
| 22 |                  | 44.781               | 142256  | 0.70   | 14197  | VV       |
| 23 |                  | 49.168               | 309852  | 1.52   | 28062  | BV       |

**Figure S3.** 2D-HPLC chromatogram of *Astragalus membranaceus* extract analyzed by evaporative light scattering detector.

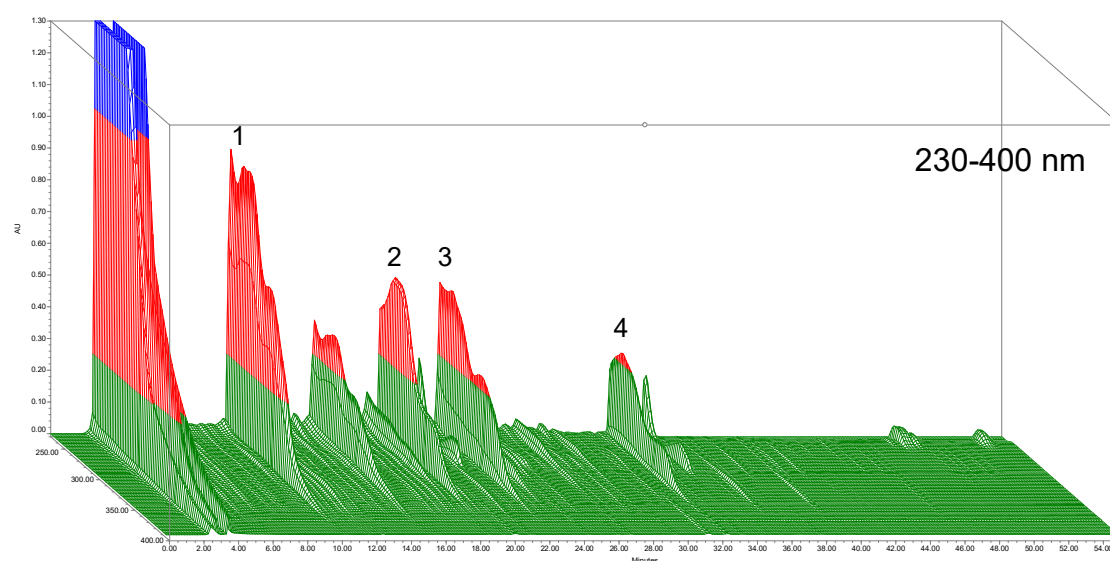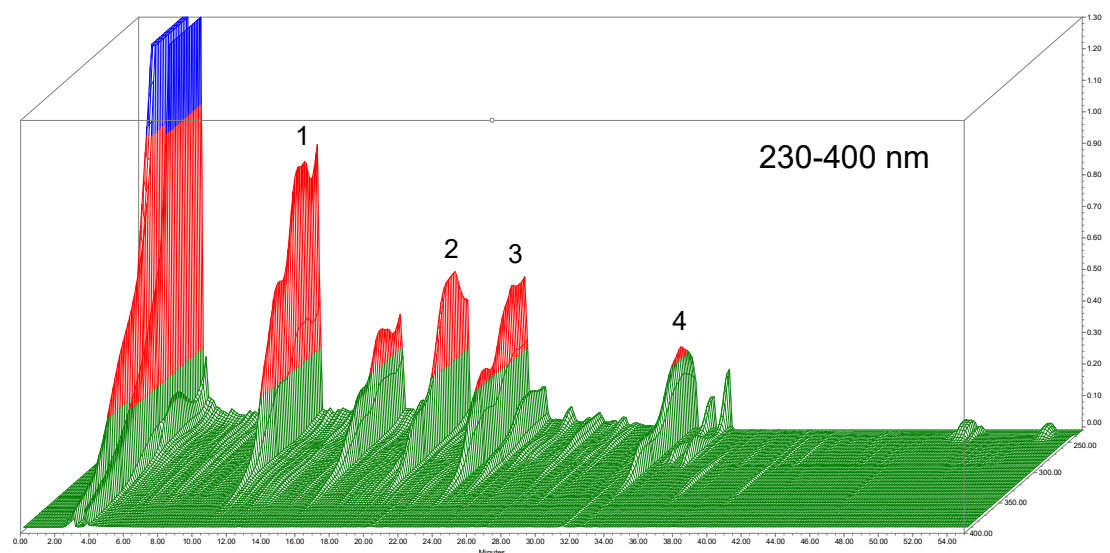

- 1 Calycosin 7-O- $\beta$ -D-glucoside
- 2 Ononin
- 3 Calycosin
- 4 Formononetin

**Figure S4.** 3D-HPLC chromatogram of *Astragalus membranaceus* extract.
